# Supplementary material for: Polydopamine-coated Au nanorods for targeted fluorescent cell imaging and photothermal therapy
Source: publisher site journal article supplement (doi:10.3762/bjnano.10.79), 2019-04-01
Supplement: Additional file 1 [file 2190-4286-10-79-S1.pdf]

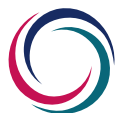

## Supporting Information

for

### **Polydopamine-coated Au nanorods for targeted fluorescent cell imaging and photothermal therapy**

Boris N. Khlebtsov, Andrey M. Burov, Timofey E. Pylaev and Nikolai G. Khlebtsov

*Beilstein J. Nanotechnol.* **2019**, *10*, 794–803. [doi:10.3762/bjnano.10.79](https://doi.org/10.3762/bjnano.10.79)

## Additional experimental data

## S1. Calculation of the AuNR concentration

According our synthetic procedure, the final Au concentration is 0.5 mM. Let assume yield of nanorods in reaction about 85%, thus mass/volume concentration of Au is about  $c \approx 85 \mu\text{g/mL}$ . According TEM data, AuNRs have s-cylinder shape with average length of  $L = 44 \text{ nm}$  and width (diameter) of  $d = 11 \text{ nm}$ . The volume of a single nanorod is  $V_1 = \frac{1}{6}\pi d^3 + \pi(L-d)\frac{d^2}{4} = 697 + 3136 = 3833 \text{ nm}^3$ . With gold density  $\rho = 19.32 \text{ g/cm}^3$ , the average mass of a single nanorod is  $m_1 = \rho V_1 = 7.64 \times 10^{-11} \text{ g}$ . The number concentration of nanorods is  $N = c/m_1 = 1.12 \times 10^{12} \text{ mL}^{-1}$ . Taking into account all approximation made, we assume the final number concentration to be about  $10^{12}$  particles per mL.

## S2. Calibration curve for determination of rhodamine 123 concentration

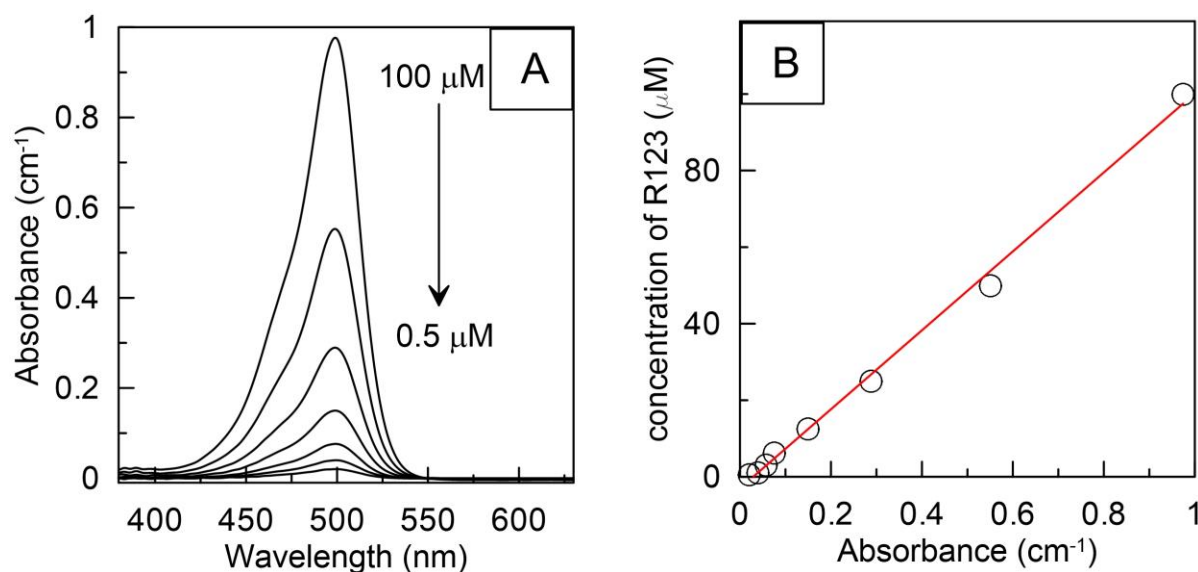

**Figure S1:** (A) Absorbance spectra of rhodamine 123 solutions with concentration from 100 to 0.5  $\mu\text{M}$  (double dilutions) measured in 1 cm cuvette. (B) Calibration curve for determination of rhodamine 123 concentration from extinction measurements. Absorbance is measured at peak wavelength 500 nm.

### S3. Dynamic light scattering study of nanocomposites at various pH

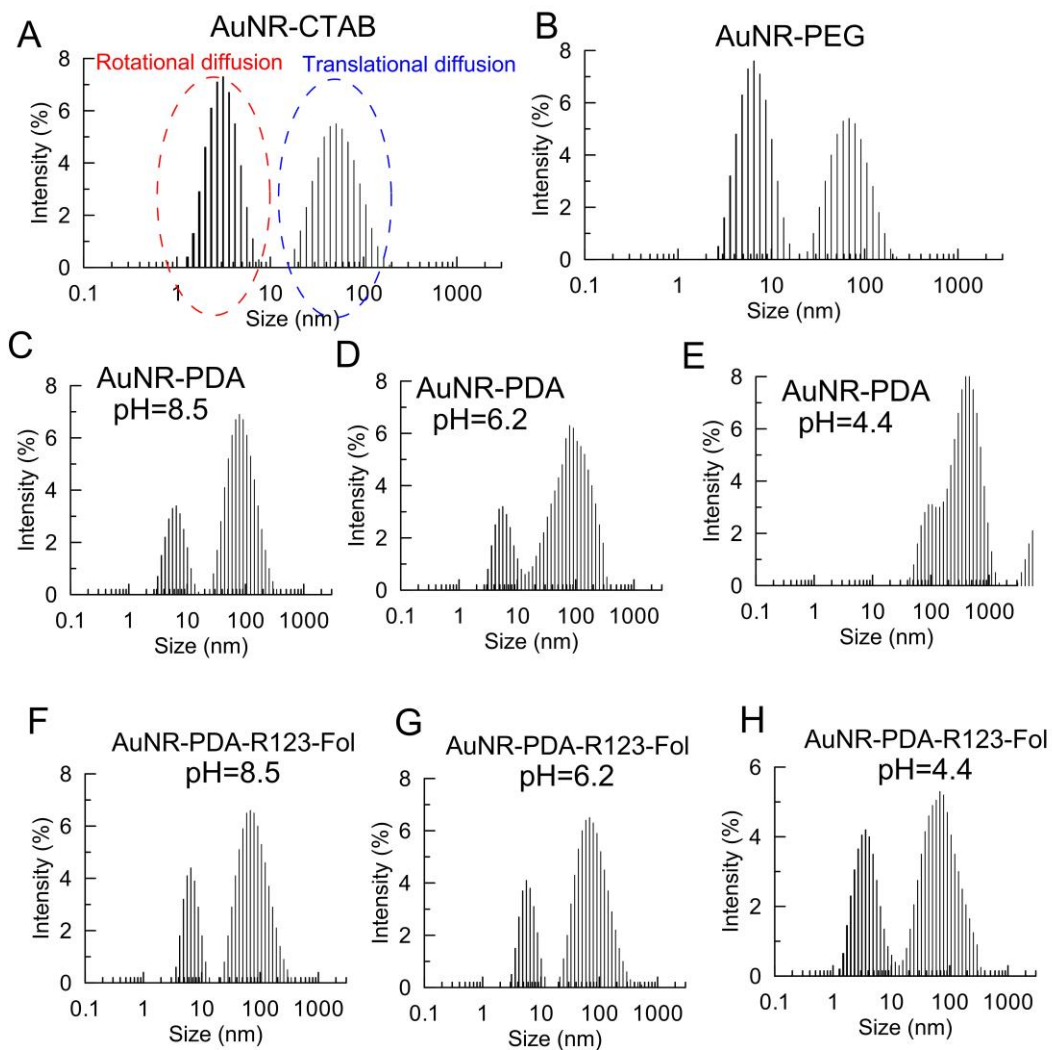

**Figure S2:** DLS size-distributions of AuNR-CTAB (A) and AuNR-PEG (B) in water; AuNR-PDA (C–E) and AuNR-PDA-R123-Folate (F–H) measured at pH 8.5 (C,F), 6.2 (D,G), and 4.4 (E,H).
